# Supplementary material
Source: PubMed Central journal article supplement (PMC6074026)
Supplement: NIHMS982347-supplement-1.pdf [file NIHMS982347-supplement-1.pdf]

**Supplementary Tables and Figures**

**Supp. Table 1. Mean (STD) Plasma Bortezomib Concentration Following Intravenous and Subcutaneous Injection**

| Cycle | Day | Hour     | Intravenous(IV) |       |       | Subcutaneous(SC) |       |       | P value<br>(Wilcoxon) |
|-------|-----|----------|-----------------|-------|-------|------------------|-------|-------|-----------------------|
|       |     |          | N               | Mean  | STD   | N                | Mean  | STD   |                       |
| 1     | 1   | Pre dose | 10              | BQL   | .     | 10               | BQL   | .     |                       |
|       | 1   | 5min     | 10              | 98.84 | 39.27 | 10               | 13    | 15.79 | 0.0002                |
|       | 1   | 30min    | 10              | 8.73  | 5.59  | 10               | 20.5  | 10.91 | 0.0082                |
|       | 1   | 5hours   | 10              | 1.82  | 1.31  | 9                | 1.96  | 0.56  | 0.1025                |
|       | 8   | Pre dose | 10              | 0.44  | 0.15  | 10               | 0.33  | 0.09  | 0.1988                |
|       | 15  | Pre dose | 8               | 0.66  | 0.22  | 10               | 0.49  | 0.12  | 0.0756                |
|       | 22  | Pre dose | 7               | 0.83  | 0.34  | 9                | 0.66  | 0.18  | 0.5604                |
|       | 22  | 5min     | 7               | 114.3 | 76.6  | 9                | 10.29 | 13.24 | 0.0012                |
|       | 22  | 30min    | 7               | 14.9  | 4.3   | 9                | 21.69 | 10.1  | 0.189                 |
|       | 22  | 5hours   | 7               | 2.85  | 1.05  | 9                | 4.16  | 2.07  | 0.2664                |
| 2     | 1   | Pre dose | 9               | 0.53  | 0.15  | 9                | 0.49  | 0.14  | 0.6587                |

min - minutes

**Supp. Figure 1. Boxplot of Bortezomib Concentration Levels for Each Time Point**

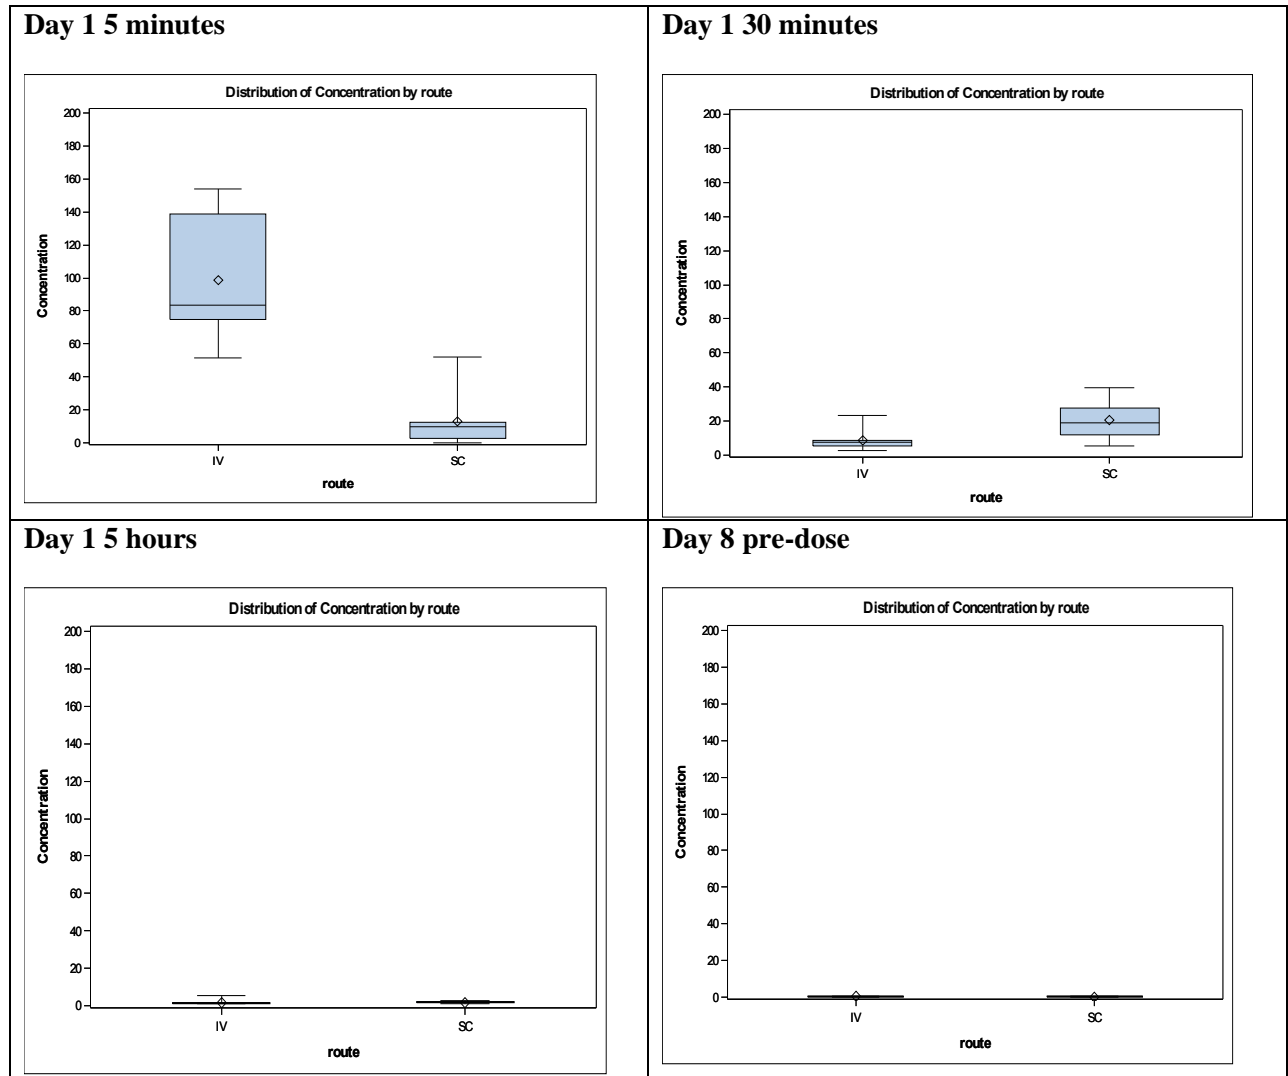

### Day 15 pre-dose

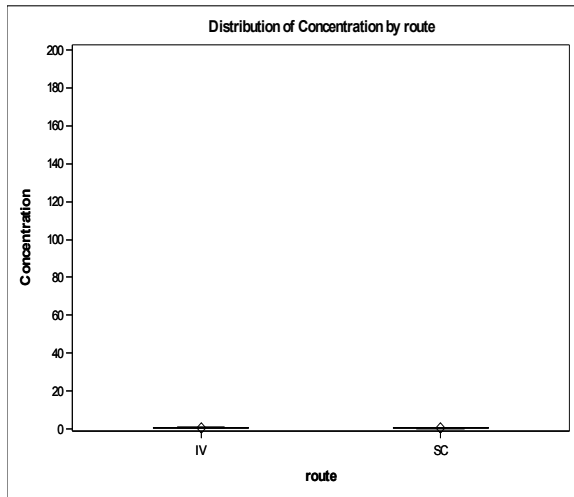

### Day 22 pre-dose

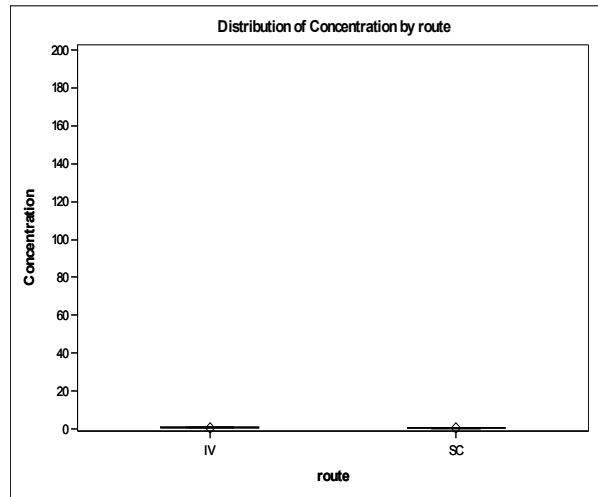

### Day 22 5 minutes

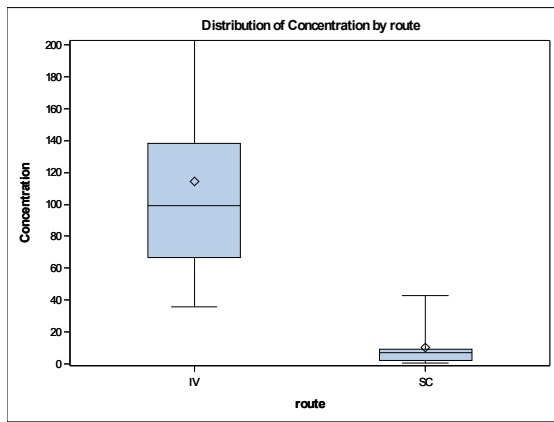

### Day 22 30 minutes

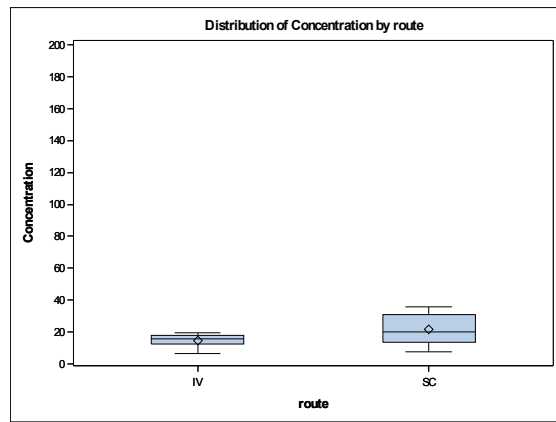

### Day 22 5 hours

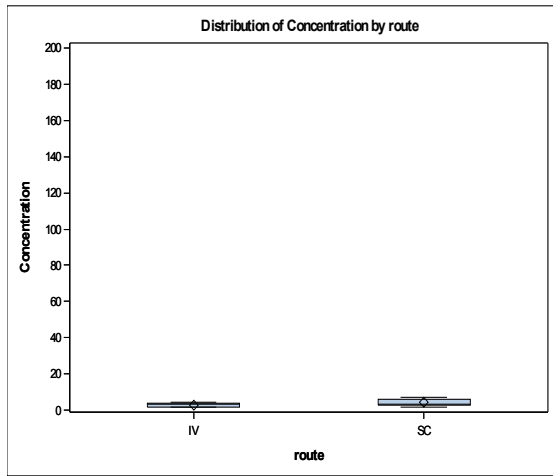

### Day 36 pre-dose (cycle 2)

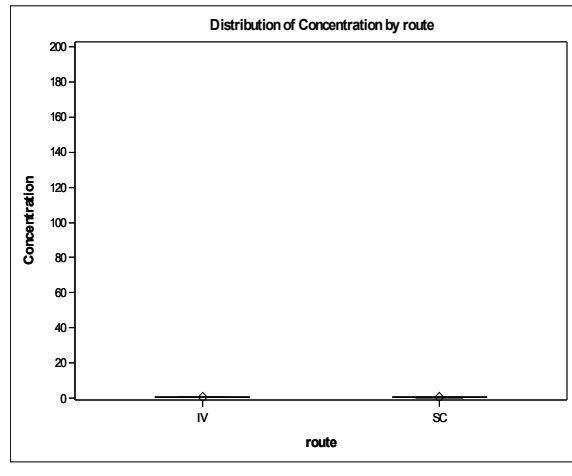

**Supp. Table 2. Quality of Life (QOL): EORTC QLQ-C30 and MY20**

|                                   | N* | Baseline    |        | EOT         |        | P-value |
|-----------------------------------|----|-------------|--------|-------------|--------|---------|
|                                   |    | Mean (SD)   | Median | Mean (SD)   | Median |         |
| <b>Global health status / QoL</b> |    |             |        |             |        |         |
| Global health status/QoL          | 30 | 63.6 (27.3) | 66.7   | 69.4 (20.8) | 75.0   | 0.6471  |
| <b>Functional scales</b>          |    |             |        |             |        |         |
| Physical functioning              | 30 | 68.4 (30.9) | 83.3   | 79.6 (18.4) | 86.7   | 0.0125  |
| Role functioning                  | 30 | 67.8 (36.3) | 75.0   | 76.7 (29.9) | 91.7   | 0.2110  |
| Emotional functioning             | 30 | 78.1 (20.8) | 83.3   | 79.7 (27.3) | 87.5   | 0.5326  |
| Cognitive functioning             | 30 | 78.3 (28.1) | 83.3   | 82.8 (22.9) | 83.3   | 0.7504  |
| Social functioning                | 30 | 75.0 (29.9) | 100.0  | 79.4 (25.4) | 83.3   | 0.3297  |
| Body image                        | 28 | 86.9 (29.2) | 100.0  | 85.7 (23.0) | 100.0  | 0.7422  |
| Future perspective                | 28 | 62.7 (22.3) | 66.7   | 72.2 (21.9) | 66.7   | 0.0227  |
| <b>Symptom scales / items</b>     |    |             |        |             |        |         |
| Fatigue                           | 30 | 35.6 (27.0) | 33.3   | 28.7 (21.7) | 27.8   | 0.1913  |
| Nausea and vomiting               | 30 | 5.0 (11.7)  | 0      | 5.0 (16.5)  | 0      | 0.7188  |
| Pain                              | 30 | 34.4 (37.1) | 25.0   | 21.1 (23.9) | 16.7   | 0.0616  |
| Dyspnea                           | 30 | 23.3 (34.1) | 0      | 12.2 (22.3) | 0      | 0.1016  |
| Insomnia                          | 29 | 26.4 (32.6) | 33.3   | 23.0 (29.7) | 0      | 0.7126  |
| Appetite loss                     | 30 | 18.9 (29.9) | 0      | 15.6 (24.3) | 0      | 0.2832  |
| Constipation                      | 30 | 25.6 (33.5) | 0      | 13.3 (20.7) | 0      | 0.1042  |
| Diarrhea                          | 30 | 10.0 (17.8) | 0      | 20.0 (29.8) | 0      | 0.1851  |
| Financial difficulties            | 30 | 16.7 (24.4) | 0      | 15.6 (24.3) | 0      | 0.4795  |
| Disease symptoms                  | 29 | 30.9 (27.4) | 22.2   | 16.5 (13.9) | 11.1   | 0.0009  |
| Side effects of treatment         | 29 | 15.6 (13.3) | 11.1   | 12.8 (12.3) | 7.4    | 0.3492  |

\* only patients having both baseline and EOT scores were included.
